# Supplementary material
Source: PubMed Central journal article supplement (PMC9561016)
Supplement: NIHMS1833260-supplement-Supplemental_Figures.pdf [file NIHMS1833260-supplement-Supplemental_Figures.pdf]

**Figure S1. Quantification of ENPP1 and cGAMP, Related to Figure 1**

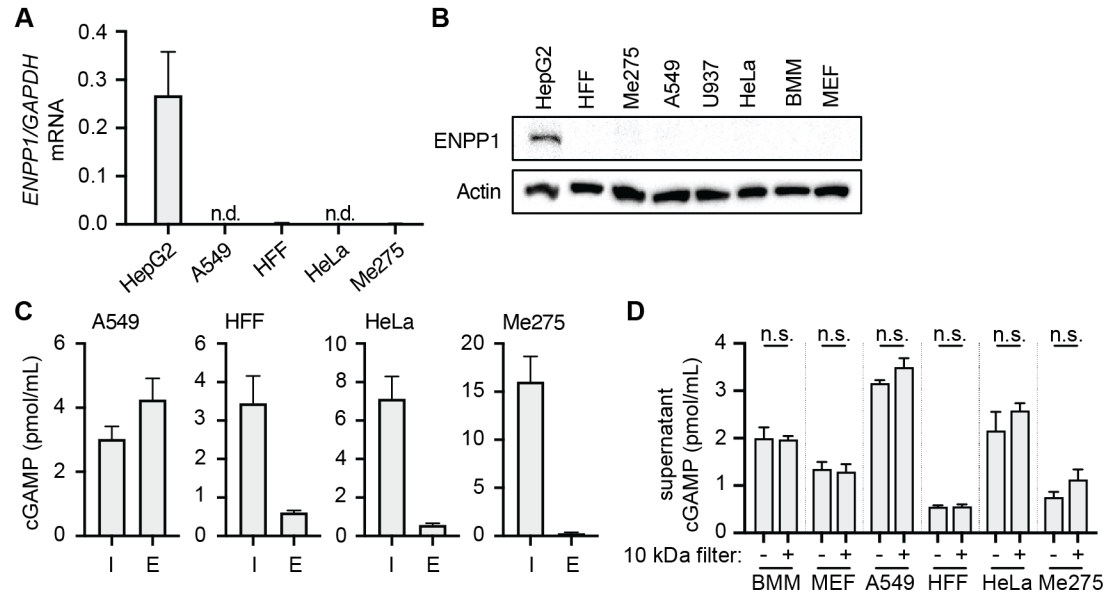

(A) Quantification of *ENPP1* mRNA transcript in indicated cell types by RT-qPCR. HepG2 cells are used as control for *ENPP1* expression.

(B) Quantification of ENPP1 protein by Western blot. HepG2 cells are used as control for ENPP1 expression.

(C) Quantification of intracellular and extracellular cGAMP from indicated cell types following CT DNA transfection for 8 hours.

(D) Quantification of extracellular cGAMP from the indicated cell types, before and after filtration through a 10 kDa filter for exosome removal. Error bars represent mean  $\pm$  SD of three biological replicates per group. All data shown are derived from a single representative experiment.

Comparative results were obtained across three independent experiments.

**Figure S2. cGAMP and Fluo-3 measurements, Related to Figure 3**

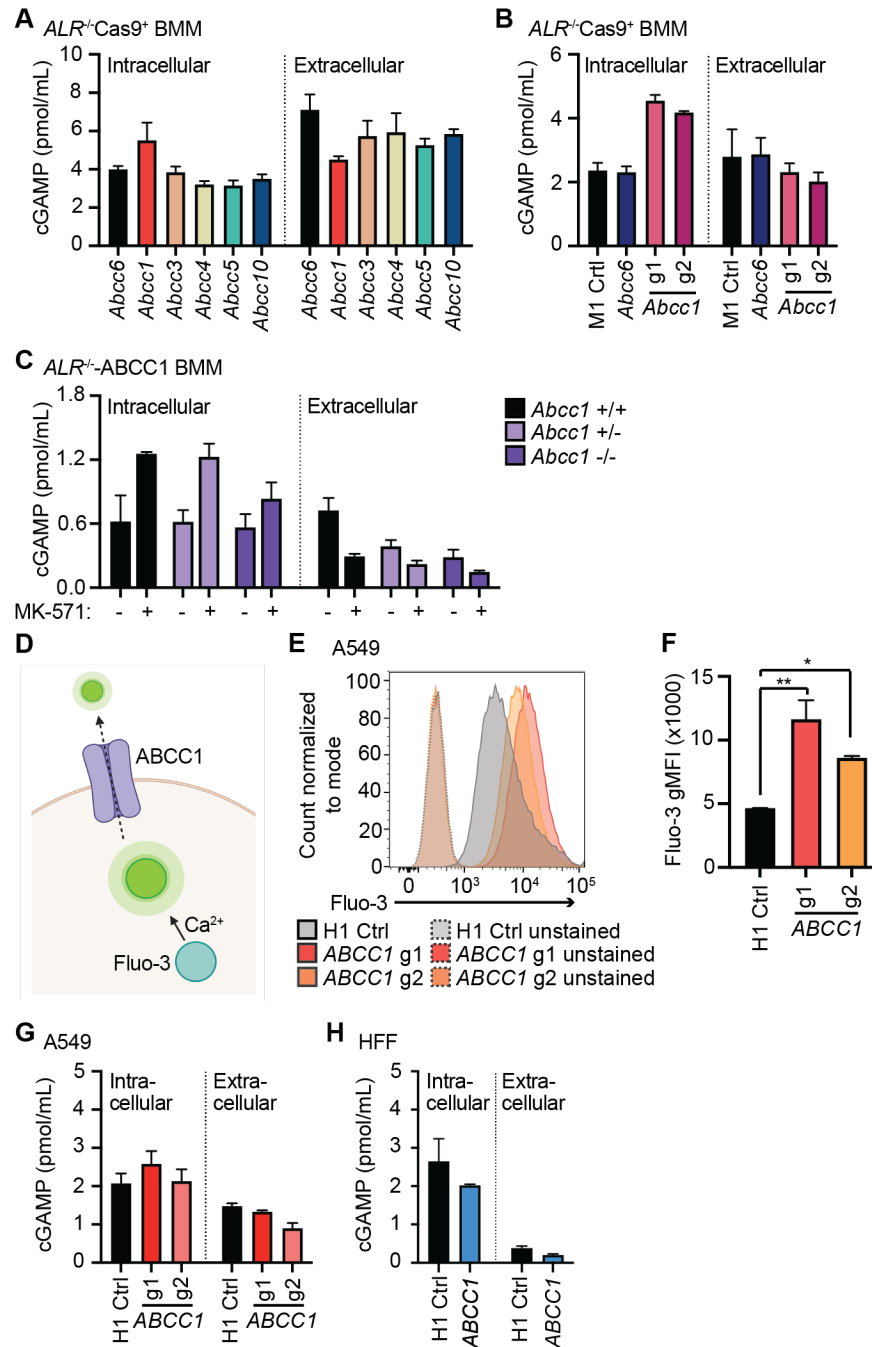

(A, B) Quantification of intracellular and extracellular cGAMP from indicated targeted lines of BMMs following CT DNA transfection for 8 hours.

(C) Quantification of intracellular and extracellular cGAMP from indicated genotypes following CT DNA transfection for 8 hours. Cells were pretreated with 25  $\mu$ M MK-571 or mock.

**(D)** Schematic of Fluo-3AM staining and export.

**(E)** *ABCC1*- or H1 control-targeted A549 cells were stained with Fluo-3AM and incubated for 1 hour at 37 C, followed by flow cytometric quantification of Fluo-3AM staining intensity.

**(F)** gMFI quantification of flow cytometry data from (E).

**(G, H)** Quantification of intracellular and extracellular cGAMP from indicated cell types following CT DNA transfection for 8 hours. Error bars represent mean  $\pm$  SD of three biological replicates per group. Statistical analysis in (E) was performed using a one-way ANOVA comparing all groups to H1 control and corrected for multiple comparisons using the Holm-Sidak method.

\* $p < 0.05$ , \*\* $p < 0.01$ . All data shown are derived from a single representative experiment.

Comparative results were obtained across two (C-E) or three (A, B, F, G) independent experiments.

**Figure S3. ENPP1, Fluo-3, and cGAMP measurements, Related to Figure 4**

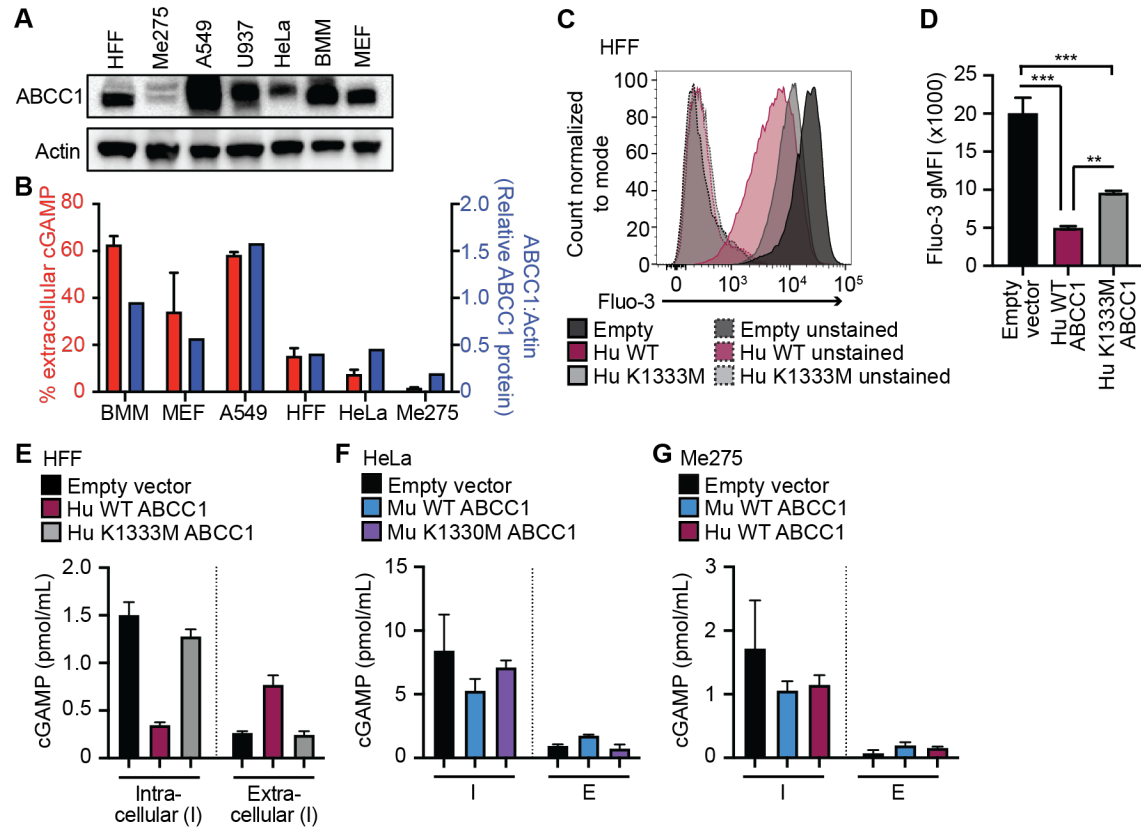

**Figure S3, refers to Figure 4**

(A) Western blot analysis of indicated cells for ABCC1 protein expression.

(B) cGAMP export efficiency calculated in Fig. 1E overlaid with densitometry from (A) for ABCC1 protein expression normalized to Actin expression.

(C) Cells from Fig. 4A were stained with Fluo-3AM and incubated for 1 hour, followed by flow cytometric quantification of Fluo-3AM staining intensity.

(D) Quantification of gMFI from (C).

(E-G) Quantification of intracellular and extracellular cGAMP from indicated cell types following CT DNA transfection for 8 hours. Error bars represent mean  $\pm$  SD of three biological replicates per group. Statistical analysis in (D) was performed using a one-way ANOVA comparing the mean of each group to the mean of every other group, corrected for multiple comparisons using the Holm-Sidak method. \*\*p < 0.01, \*\*\*p < 0.001. All data shown are derived from a single representative experiment. Comparative results were obtained across three independent experiments (C-G).
